# Supplementary material for: Microbicidal Activity of Octenidine Oromucosal Solution against Periodontal Bacteria and Yeast: An In Vitro Study
Source: Preprints.org preprint supplement (doi:10.20944/preprints202410.0133.v1), 2024-10-03
Supplement: Supplementary file 1 [file supplementary]

**Supplementary Tables**

**Table S1: Test yeast strains**

| **Yeast** | **Strain** |
| --- | --- |
| *Candida albicans* | ATCC 10231 |
| *Candida auris* | DSM 21092 |
| *Candida auris* | DSM 105986 |

**Table S2:** **Bactericidal efficacy of the octenidine oromucosal solution* (Data from Laboratory 1)**

| **Bacterial strain** | **lg RF** | | |
| --- | --- | --- | --- |
| **0.01% concentration** | **50% concentration** | **80% concentration** |
| *Capnocytophaga gingivalis* | <2.61 | 4.59 | >5.28 |
| *Porphyromonas gingivalis* | <2.56 | >5.23 | >5.23 |
| *Prevotella buccalis* | <2.57 | 5.06 | >5.24 |
| *Parvimonas micra* | <2.74 | 5.11 | >5.41 |
| *Eikenella corrodens* | <2.59 | >5.26 | >5.26 |
| *Aggregatibacter actinomycetemcomitans* | <2.55 | 4.54 | >5.22 |
| *Fusobacterium nucleatum* | <2.67 | 4.77 | 5.26 |
| *Dialister pneumosintes* | <2.53 | 5.20 | >5.20 |
| *Schaalia odontolytica*  *(Actinomyces odontolyticus)* | <2.42 | 5.09 | >5.09 |
| *Campylobacter rectus* | <2.42 | 5.09 | >5.09 |

lg RF, log reduction factor

*octenident® antiseptic (Schülke & Mayr GmbH, Norderstedt, Germany)

**Table S3:** **Bactericidal efficacy of the octenidine oromucosal solution* (Data from Laboratory 2)**

| **Bacterial strain** | **lg RF** | | |
| --- | --- | --- | --- |
| **0.1% concentration** | **80% concentration** | **97% concentration** |
| *Capnocytophaga gingivalis* | <3.39 | >5.06 | >5.06 |
| *Porphyromonas gingivalis* | <4.47 | >5.54 | >5.54 |
| *Prevotella buccalis* | <4.40 | 5.06 | 5.43 |
| *Parvimonas micra* | <3.97 | >5.04 | >5.04 |
| *Eikenella corrodens* | <3.13 | >5.05 | >5.50 |
| *Aggregatibacter actinomycetemcomitans* | <3.98 | 4.89 | >5.05 |
| *Fusobacterium nucleatum* | <3.39 | >5.06 | >5.06 |
| *Dialister pneumosintes* | <4.42 | >5.49 | >5.49 |
| *Schaalia odontolytica*  *(Actinomyces odontolyticus)* | <4.03 | >5.10 | >5.10 |
| *Campylobacter rectus* | >4.02 | >5.09 | >5.09 |

lg RF, log reduction factor

*octenident® antiseptic (Schülke & Mayr GmbH, Norderstedt, Germany)

**Table S4: Yeasticidal efficacy of the octenidine oromucosal solution***

| Yeast strain |  | lg RF | | |
| --- | --- | --- | --- | --- |
| **10% concentration** | **50% concentration** | **80% concentration** | **97% concentration** |
| *Candida albicans*  (ATCC 10231) | <1.73 | 2.41 | >4.40 | >4.36 |
| *Candida auris* (DSM 21092) | <2.07 | >4.74 | >4.74 | >4.37 |
| *Candida auris* (DSM 105986) | <1.88 | >4.58 | >4.58 | >4.49 |

lg RF, log reduction factor

*octenident® antiseptic (Schülke & Mayr GmbH, Norderstedt, Germany)
